# Supplementary material for: Evaluation of root zone soil moisture products over the Huai River basin
Source: Copernicus journal article supplement (doi:10.5194/hess-28-2375-2024), 2024-06-05
Supplement: Supplementary file 1 [file hess-28-2375-2024-supplement.pdf]

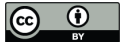

*Supplement of*

## **Evaluation of root zone soil moisture products over the Huai River basin**

**En Liu et al.**

*Correspondence to:* Yonghua Zhu (zhuyonghua@hhu.edu.cn) and Jean-Christophe Calvet (jean-christophe.calvet@meteo.fr)

The copyright of individual parts of the supplement might differ from the article licence.

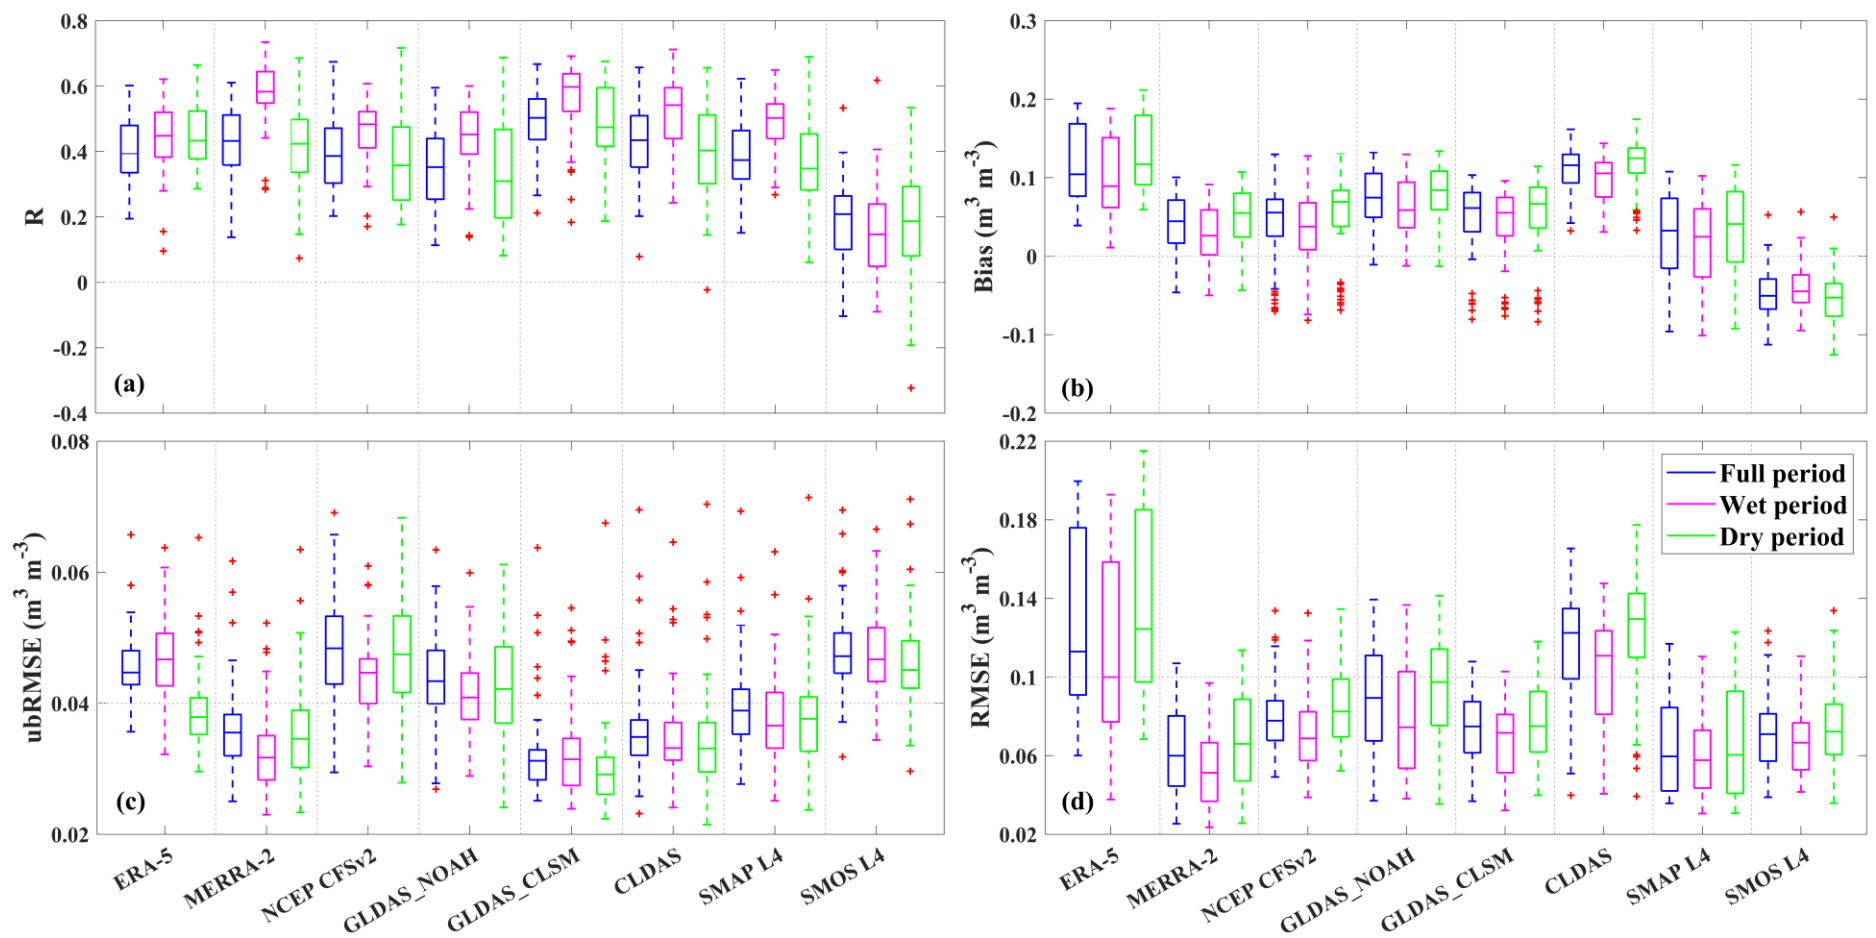

Fig. S1 Single-station RZSM comparison between model-derived RZSM and in situ soil moisture observations for different periods, including the Full period (from 1 April 2015 to 31 March 2020), Wet period (from June to September) and Dry period (from October to May). Each outlier “+” represents an *in situ* station. The five horizontal lines of the box plot represent the minimum, 25<sup>th</sup> percentile, 50<sup>th</sup> percentile, 75<sup>th</sup> percentile and maximum from bottom to top, respectively.

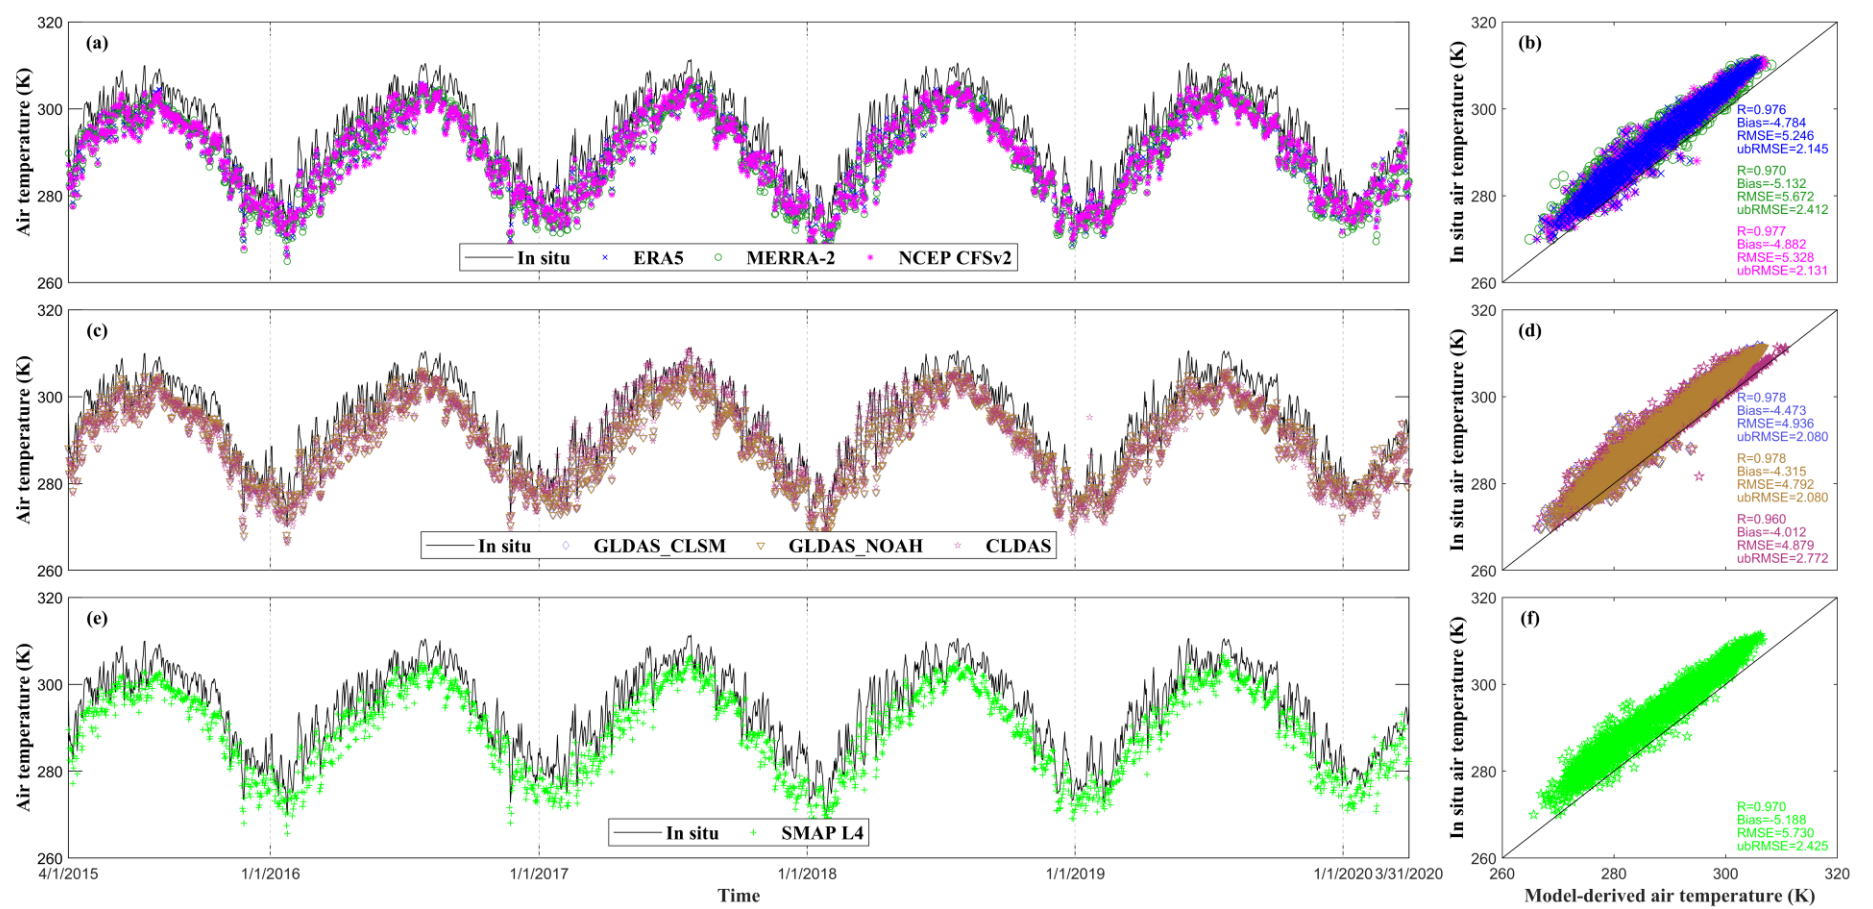

Fig. S2 Stations-averaged air temperature comparison between modeled air temperature and CMA air temperature dataset spanning the period from April 1, 2015 to March 31, 2020, including the time series (left panel) and scatterplots (right panel). ERA5, MERRA-2, NCEP CFSv2, GLDAS\_CLSM, GLDAS\_NOAH, CLDAS and CMA products provide the air temperature datasets at the 2-m screen level. SMAP L4 product provides the air temperature at center height of the lowest atmospheric model layer.

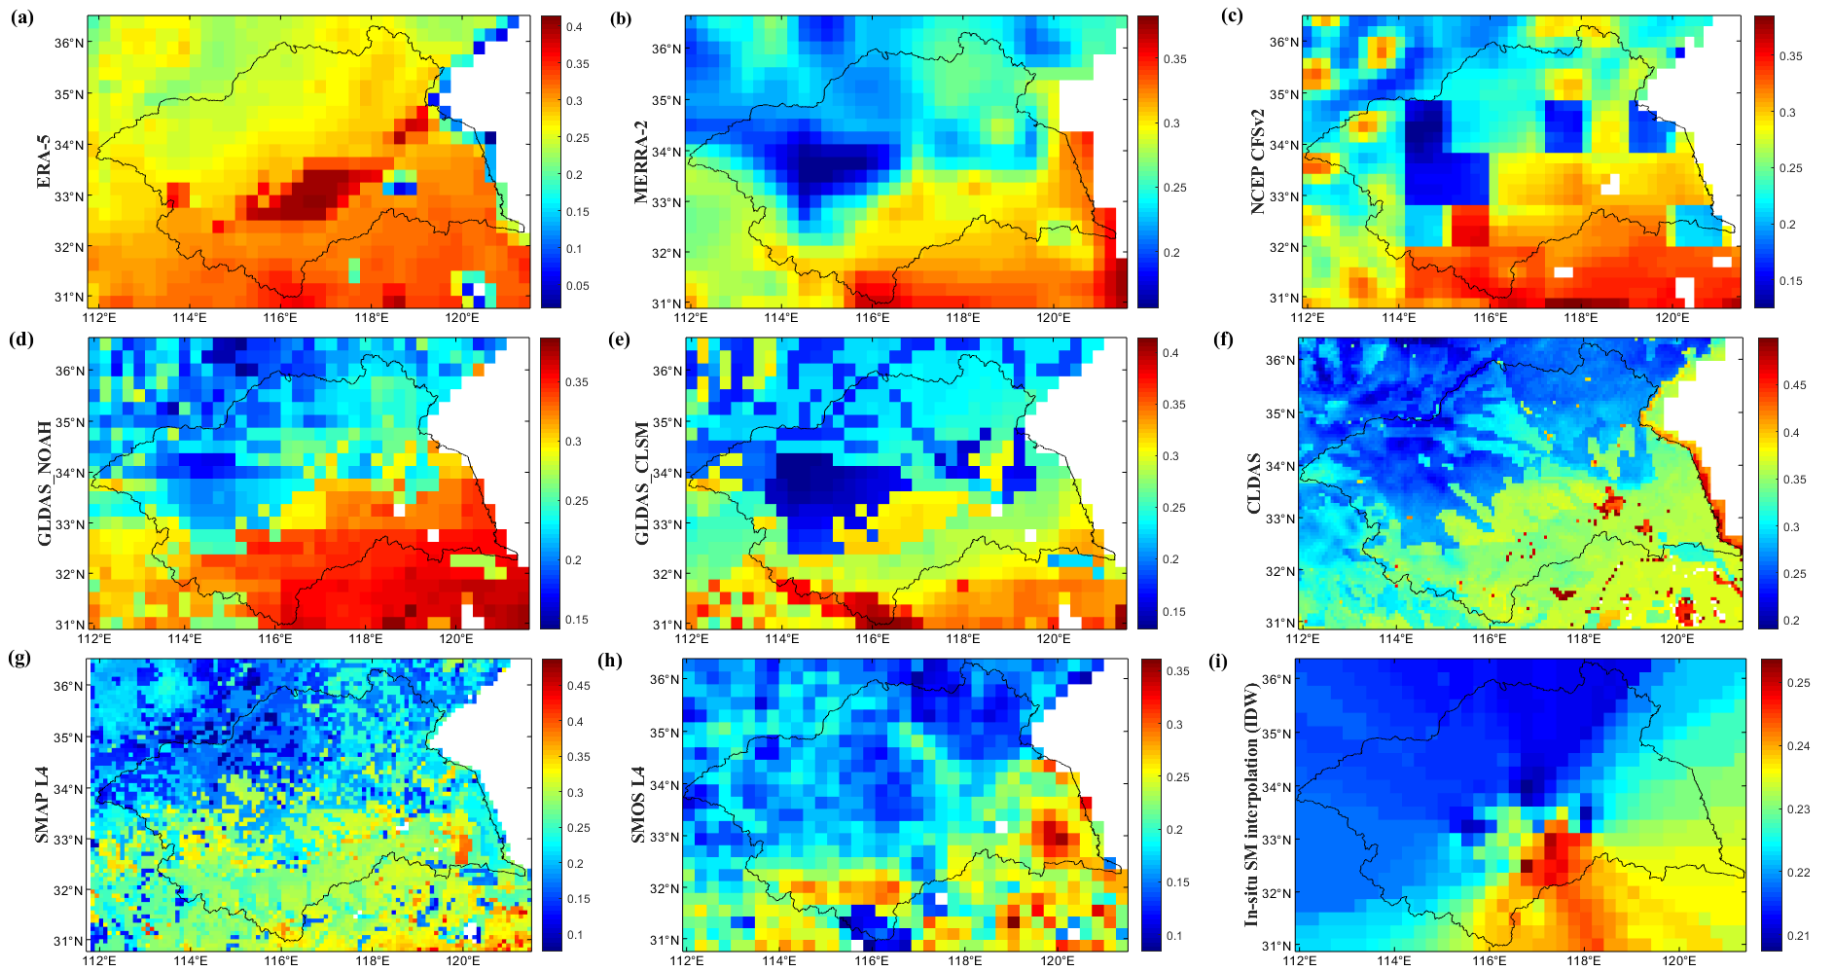

15

Fig. S3 Spatial distribution pattern of eight RZSM products and in situ observations interpolated using Inverse Distance Weighting (IDW) averaged over from 1 April 2015 to 31 March 2020.

Table. S1 Statistical metrics of eight RZSM products validated by *in situ* measurements (0-100 cm) at each station from 1 April 2015 to 31 March 2020. Mean score values and their standard deviation (brackets) are given for all seasons, wet season, and dry season.

| Dataset    | Period | <i>In situ</i> validation (raw) |                                             |                                           | <i>In situ</i> validation (anomaly) |                    |                     |
|------------|--------|---------------------------------|---------------------------------------------|-------------------------------------------|-------------------------------------|--------------------|---------------------|
|            |        | R                               | ubRMSE<br>(m <sup>3</sup> m <sup>-3</sup> ) | Bias<br>(m <sup>3</sup> m <sup>-3</sup> ) | R                                   | ubRMSE<br>(-)      | Bias<br>(-)         |
| ERA-5      | All    | 0.40 (0.10)                     | 0.045 (0.005)                               | 0.104 (0.047)                             | 0.41 (0.08)                         | 0.94 (0.07)        | -0.00 (0.01)        |
|            | Wet    | 0.45 (0.10)                     | 0.047 (0.006)                               | 0.089 (0.048)                             | 0.49 (0.11)                         | 0.91 (0.09)        | -0.02 (0.02)        |
|            | Dry    | 0.43 (0.10)                     | 0.038 (0.006)                               | 0.117 (0.046)                             | 0.33 (0.08)                         | 0.97 (0.06)        | 0.01 (0.01)         |
| MERRA-2    | All    | 0.43 (0.10)                     | 0.036 (0.007)                               | 0.044 (0.036)                             | 0.51(0.11)                          | 0.89 (0.09)        | -0.00 (0.01)        |
|            | Wet    | 0.58 (0.09)                     | 0.032 (0.006)                               | 0.026 (0.035)                             | 0.61 (0.14)                         | 0.81 (0.12)        | -0.03 (0.02)        |
|            | Dry    | 0.42 (0.12)                     | 0.035 (0.008)                               | 0.055 (0.038)                             | 0.42 (0.10)                         | 0.94 (0.07)        | 0.02 (0.01)         |
| NCEP CFSv2 | All    | 0.39 (0.11)                     | 0.048 (0.008)                               | 0.056 (0.052)                             | 0.43 (0.10)                         | 0.92(0.08)         | -0.01 (0.01)        |
|            | Wet    | 0.48 (0.09)                     | 0.045 (0.006)                               | 0.038 (0.051)                             | 0.51 (0.12)                         | 0.88 (0.10)        | -0.03 (0.02)        |
|            | Dry    | 0.36 (0.14)                     | 0.047 (0.010)                               | 0.069 (0.053)                             | 0.36 (0.09)                         | 0.96 (0.08)        | 0.01 (0.02)         |
| GLDAS_NOAH | All    | 0.35 (0.12)                     | 0.043 (0.007)                               | 0.075 (0.038)                             | 0.31 (0.08)                         | 1.02 (0.07)        | -0.01 (0.01)        |
|            | Wet    | 0.45 (0.11)                     | 0.041 (0.006)                               | 0.059 (0.040)                             | 0.40 (0.11)                         | 0.97 (0.11)        | -0.02 (0.02)        |
|            | Dry    | 0.31 (0.15)                     | 0.042 (0.008)                               | 0.084 (0.038)                             | 0.22 (0.06)                         | 1.05 (0.06)        | -0.01 (0.01)        |
| GLDAS_CLSM | All    | <b>0.50</b> (0.09)              | <b>0.031</b> (0.007)                        | 0.061 (0.051)                             | 0.49 (0.12)                         | 0.91 (0.10)        | -0.01 (0.01)        |
|            | Wet    | <b>0.60</b> (0.11)              | <b>0.031</b> (0.007)                        | 0.055 (0.050)                             | 0.58 (0.15)                         | 0.84 (0.13)        | -0.03 (0.02)        |
|            | Dry    | <b>0.47</b> (0.12)              | <b>0.029</b> (0.007)                        | 0.067 (0.052)                             | 0.42 (0.11)                         | 0.96 (0.086)       | <b>0.00</b> (0.01)  |
| CLDAS      | All    | 0.44 (0.12)                     | 0.035 (0.008)                               | 0.116 (0.032)                             | <b>0.53</b> (0.12)                  | <b>0.86</b> (0.10) | -0.01 (0.01)        |
|            | Wet    | 0.54 (0.11)                     | 0.033 (0.007)                               | 0.105 (0.032)                             | <b>0.65</b> (0.16)                  | <b>0.76</b> (0.14) | -0.02 (0.02)        |
|            | Dry    | 0.40 (0.14)                     | 0.033 (0.009)                               | 0.125 (0.033)                             | <b>0.44</b> (0.10)                  | <b>0.93</b> (0.08) | 0.00 (0.01)         |
| SMAP L4    | All    | 0.37 (0.10)                     | 0.039 (0.007)                               | <b>0.033</b> (0.049)                      | 0.49 (0.11)                         | 0.90 (0.08)        | <b>0.00</b> (0.01)  |
|            | Wet    | 0.50 (0.08)                     | 0.037 (0.007)                               | <b>0.025</b> (0.049)                      | 0.60 (0.14)                         | 0.81 (0.11)        | -0.02 (0.02)        |
|            | Dry    | 0.35 (0.12)                     | 0.038 (0.008)                               | <b>0.041</b> (0.049)                      | 0.41 (0.09)                         | 0.95 (0.07)        | 0.02 (0.01)         |
| SMOS L4    | All    | 0.21 (0.13)                     | 0.048 (0.007)                               | -0.050 (0.030)                            | 0.06 (0.06)                         | 1.14 (0.05)        | -0.00 (0.03)        |
|            | Wet    | 0.15 (0.13)                     | 0.047 (0.007)                               | -0.045 (0.030)                            | 0.07 (0.07)                         | 1.16 (0.06)        | <b>-0.01</b> (0.05) |
|            | Dry    | 0.19 (0.16)                     | 0.045 (0.007)                               | -0.053 (0.032)                            | 0.05 (0.08)                         | 1.14 (0.06)        | 0.01 (0.04)         |

Note: Bold values denote the optimal values for each period. Data points used in this study at each station are 1827.

Table. S2 Overview of in situ stations in the Huai River Basin.

| Station ID | Station Name | Longitude (E) | Latitude (N) | Elevation (m) | Land cover     | Total soil moisture observations | Number of missing soil moisture observations |
|------------|--------------|---------------|--------------|---------------|----------------|----------------------------------|----------------------------------------------|
| 50402241   | Taolaoba     | 117.164       | 32.184       | 48            | Irrigated Crop | 1827                             | 18                                           |
| 50403609   | Chahua       | 116.022       | 33.033       | 39            | Rainfed Crop   | 1827                             | 23                                           |
| 50403809   | Hanting      | 116.319       | 33.021       | 28            | Rainfed Crop   | 1827                             | 20                                           |
| 50420400   | Songji       | 115.271       | 32.815       | 39            | Rainfed Crop   | 1827                             | 25                                           |
| 50421000   | Funan        | 115.571       | 32.637       | 33            | Rainfed Crop   | 1827                             | 51                                           |
| 50421800   | Santa        | 115.697       | 32.808       | 33            | Rainfed Crop   | 1827                             | 51                                           |
| 50423201   | Yaoli        | 116.172       | 31.823       | 58            | Irrigated Crop | 1827                             | 75                                           |
| 50424701   | Guanting     | 116.851       | 31.797       | 51            | Irrigated Crop | 1827                             | 19                                           |
| 50426001   | Zhuangmu     | 117.112       | 32.363       | 27            | Irrigated Crop | 1827                             | 15                                           |
| 50426072   | Guiji        | 116.623       | 32.778       | 23            | Irrigated Crop | 1827                             | 20                                           |
| 50426801   | Xiaji        | 116.540       | 32.654       | 25            | Rainfed Crop   | 1827                             | 18                                           |
| 50429700   | Shuangfu     | 115.569       | 33.342       | 37            | Rainfed Crop   | 1827                             | 52                                           |
| 50430100   | Fentai       | 115.727       | 33.455       | 35            | Rainfed Crop   | 1827                             | 51                                           |
| 50430117   | Santang      | 115.829       | 33.314       | 32            | Rainfed Crop   | 1827                             | 26                                           |
| 50430709   | Lixin        | 116.209       | 33.143       | 28            | Rainfed Crop   | 1827                             | 47                                           |
| 50601600   | Jieshou      | 115.359       | 33.265       | 42            | Rainfed Crop   | 1827                             | 51                                           |
| 50609001   | Yangqiao     | 115.392       | 33.017       | 28            | Rainfed Crop   | 1827                             | 52                                           |
| 50634550   | Guangwu      | 115.334       | 33.374       | 42            | Rainfed Crop   | 1827                             | 25                                           |
| 50636750   | Huangling    | 115.134       | 33.041       | 37            | Rainfed Crop   | 1827                             | 51                                           |

| Station ID | Station Name          | Longitude (E) | Latitude (N) | Elevation (m) | Land cover     | Total soil moisture observations | Number of missing soil moisture observations |
|------------|-----------------------|---------------|--------------|---------------|----------------|----------------------------------|----------------------------------------------|
| 50637371   | Quanyang              | 115.437       | 33.112       | 35            | Rainfed Crop   | 1827                             | 26                                           |
| 50637413   | Kanheliu              | 115.852       | 33.099       | 33            | Rainfed Crop   | 1827                             | 52                                           |
| 50637427   | Kouziji               | 116.087       | 32.844       | 26            | Rainfed Crop   | 1827                             | 51                                           |
| 50637450   | Sanshilipu            | 116.106       | 32.697       | 27            | Rainfed Crop   | 1827                             | 52                                           |
| 50637459   | Xiaqiao               | 116.384       | 32.643       | 26            | Rainfed Crop   | 1827                             | 53                                           |
| 50700401   | Hengpaitou            | 116.364       | 31.590       | 72            | Woodland       | 1827                             | 58                                           |
| 50701303   | Xianghongdianxiakuxia | 116.177       | 31.580       | 116           | Woodland       | 1827                             | 48                                           |
| 50725311   | Wangchenggang         | 116.526       | 31.740       | 76            | Irrigated Crop | 1827                             | 43                                           |
| 50830409   | Lumiao                | 115.795       | 33.998       | 39            | Rainfed Crop   | 1827                             | 51                                           |
| 50830419   | Dasi                  | 115.873       | 33.802       | 42            | Rainfed Crop   | 1827                             | 49                                           |
| 50830439   | Youhe                 | 115.789       | 33.631       | 38            | Rainfed Crop   | 1827                             | 24                                           |
| 50830449   | Huagou                | 116.063       | 33.510       | 33            | Rainfed Crop   | 1827                             | 16                                           |
| 50830480   | Dahu                  | 116.351       | 33.515       | 31            | Rainfed Crop   | 1827                             | 18                                           |
| 50830489   | Chenqiao              | 116.561       | 33.094       | 25            | Rainfed Crop   | 1827                             | 50                                           |
| 50830601   | Heliu                 | 116.967       | 33.033       | 25            | Rainfed Crop   | 1827                             | 18                                           |
| 50900601   | Linhuanzha            | 116.567       | 33.667       | 29            | Rainfed Crop   | 1827                             | 18                                           |
| 50901501   | Guzhenzha             | 117.333       | 33.300       | 18            | Rainfed Crop   | 1827                             | 16                                           |
| 50903176   | Wudaogou              | 117.341       | 33.156       | 21            | Rainfed Crop   | 1827                             | 19                                           |
| 50903421   | Hexiangzha            | 117.183       | 33.000       | 18            | Rainfed Crop   | 1827                             | 21                                           |
| 50903600   | Tancheng              | 116.557       | 33.441       | 29            | Rainfed Crop   | 1827                             | 23                                           |

| Station ID | Station Name    | Longitude (E) | Latitude (N) | Elevation (m) | Land cover   | Total soil moisture observations | Number of missing soil moisture observations |
|------------|-----------------|---------------|--------------|---------------|--------------|----------------------------------|----------------------------------------------|
| 50903541   | Xibakou         | 117.867       | 33.150       | 11            | Rainfed Crop | 1827                             | 18                                           |
| 50907801   | Xulouzha        | 116.750       | 33.917       | 30            | Rainfed Crop | 1827                             | 15                                           |
| 50908001   | Suxianzha       | 117.083       | 33.667       | 28            | Rainfed Crop | 1827                             | 16                                           |
| 50909701   | Gukouzha        | 116.450       | 34.267       | 39            | Rainfed Crop | 1827                             | 17                                           |
| 50912201   | Kuaitanggou     | 117.550       | 33.750       | 20            | Rainfed Crop | 1827                             | 17                                           |
| 50913201   | Yanglou         | 116.783       | 34.317       | 39            | Rainfed Crop | 1827                             | 18                                           |
| 50913901   | Langanji        | 117.233       | 33.934       | 25            | Rainfed Crop | 1827                             | 16                                           |
| 50922032   | Dulou           | 116.850       | 34.200       | 37            | Rainfed Crop | 1827                             | 16                                           |
| 50922072   | Xiangyang       | 117.583       | 33.467       | 24            | Rainfed Crop | 1827                             | 18                                           |
| 50922172   | Shuangdui       | 116.900       | 33.417       | 25            | Rainfed Crop | 1827                             | 16                                           |
| 50922232   | Shuoli          | 116.900       | 34.033       | 32            | Rainfed Crop | 1827                             | 15                                           |
| 50922332   | Huangmiao       | 117.652       | 33.079       | 19            | Rainfed Crop | 1827                             | 17                                           |
| 50924801   | Baoji           | 117.113       | 33.158       | 22            | Rainfed Crop | 1827                             | 20                                           |
| 50925801   | Dinghouying     | 117.338       | 33.457       | 24            | Rainfed Crop | 1827                             | 16                                           |
| 50931578   | Xuanmiao        | 116.267       | 34.517       | 54            | Rainfed Crop | 1827                             | 17                                           |
| 50932801   | Longhai         | 116.350       | 34.400       | 45            | Rainfed Crop | 1827                             | 16                                           |
| 50933001   | Zhangzhuangzhai | 116.600       | 34.117       | 37            | Rainfed Crop | 1827                             | 16                                           |
| 50935201   | Sixian          | 117.917       | 33.434       | 16            | Rainfed Crop | 1827                             | 16                                           |
| 50938101   | Dazhuang        | 117.867       | 33.667       | 20            | Rainfed Crop | 1827                             | 15                                           |
